# Supplementary material
Source: PubMed Central journal article supplement (PMC3593860)
Supplement: 1301889110_pnas.201301889SI.pdf [file 1301889110_pnas.201301889SI.pdf]

# Supporting Information

Jin et al. 10.1073/pnas.1301889110

## SI Experimental Procedures

**Electron Microscopy.** Single colonies were fixed in Karnovsky's fixative at 4 °C overnight. The colonies, placed in a round bottom 96-well plate under direct visualization of a microscope to facilitate rinsing without losing them, were washed three times with cacodylate buffer (1). Colonies were transferred to an Eppendorf tube, incubated with 1% osmium tetroxide in 0.1 M cacodylate buffer for 30 min, washed three times, dehydrated, embedded in eponate, and processed for transmission electron microscopy.

**Immunostaining.** Colonies were manually picked and fixed in 4% paraformaldehyde at 4 °C overnight. For frozen sections, colonies were cryoprotected in 30% sucrose in PBS, then embedded in Optimal Cutting Temperature compound (Sakura Finetek), and sections were cut at 10 μm. For whole-mount immunohistochemistry, colonies were incubated with blocking buffer containing 5% donkey serum and 0.1% triton at 4 °C overnight. Primary antibodies used were as listed in Table S2 and were detected with donkey-raised secondary antibodies conjugated to cyanine (Cy) 3, Cy5, DyLight488 (Jackson ImmunoResearch), or Alexa488 (Invitrogen) at 1:2,000 dilution (1:500 for Cy5).

ApoTome images were captured on a Zeiss Axio Observer Z1 microscope with Zeiss AxioVision 4.8 and figures prepared with Adobe Photoshop/Illustrator CS3. Projection of z-stacks to 3D images or movies was performed with Axiovision 4.8.

**In Vitro Glucose Challenge Assay.** Endocrine/Acinar colonies (100/well × 3 wells) were handpicked, pooled, and incubated overnight with Krebs–Ringer Bicarbonate HEPES solution (KRBH; 129 mM NaCl, 4.8 mM KCl, 2.5 mM CaCl<sub>2</sub>, 1.2 mM KH<sub>2</sub>PO<sub>4</sub>, 1.2 mM MgSO<sub>4</sub>, 5 mM NaHCO<sub>3</sub>, 10 mM HEPES, 0.1% BSA) containing 10% fetal calf serum (FCS) and 2.5 mM D-glucose. The next day, cells were washed three times with KRBH containing 2% FCS and 2.5 mM D-glucose, and then incubated with 2.5 mM D-glucose followed by 16.7 mM D-glucose and 16.7 mM D-glucose plus 10 mM theophylline (37 °C, 0.5 mL/well, 2 h). The C-peptide concentration in the buffer was measured using the murine C-peptide ELISA kit, U-Type (Shibayaji Co.), which has a detection limit of 30 pg/mL. The stimulation was expressed as the fold change of C-peptide concentrations in buffer compared with the low D-glucose treatment of the same well.

1. Reddy JK, et al. (1984) Induction and origin of hepatocytes in rat pancreas. *J Cell Biol* 98(6):2082–2090.

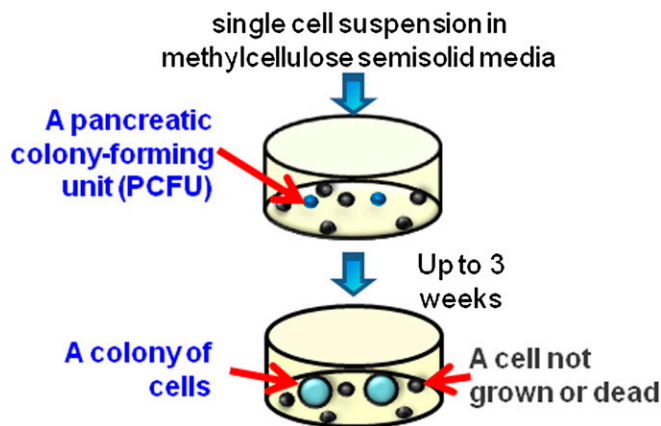

**Fig. S1.** Concept for in vitro methylcellulose-based colony assay. Pancreata were dissociated into single-cell suspension by collagenase B and DNase I and plated in semisolid media for colony formation. Methylcellulose is a biologically inert material that provides viscosity to the media, restricting the movement of single cells. A progenitor-like cell (i.e., a pancreatic colony-forming unit) may self-renew and differentiate and give rise to a colony. By analyzing lineage marker expression in a colony, the lineage potential of the originating single cell can be revealed. By dissociating and replating the cells from a colony, the self-renewal potential of the initiating single cell can be determined. Two pancreatic colony assays are established in this report; one contains Matrigel and the other laminin hydrogel.

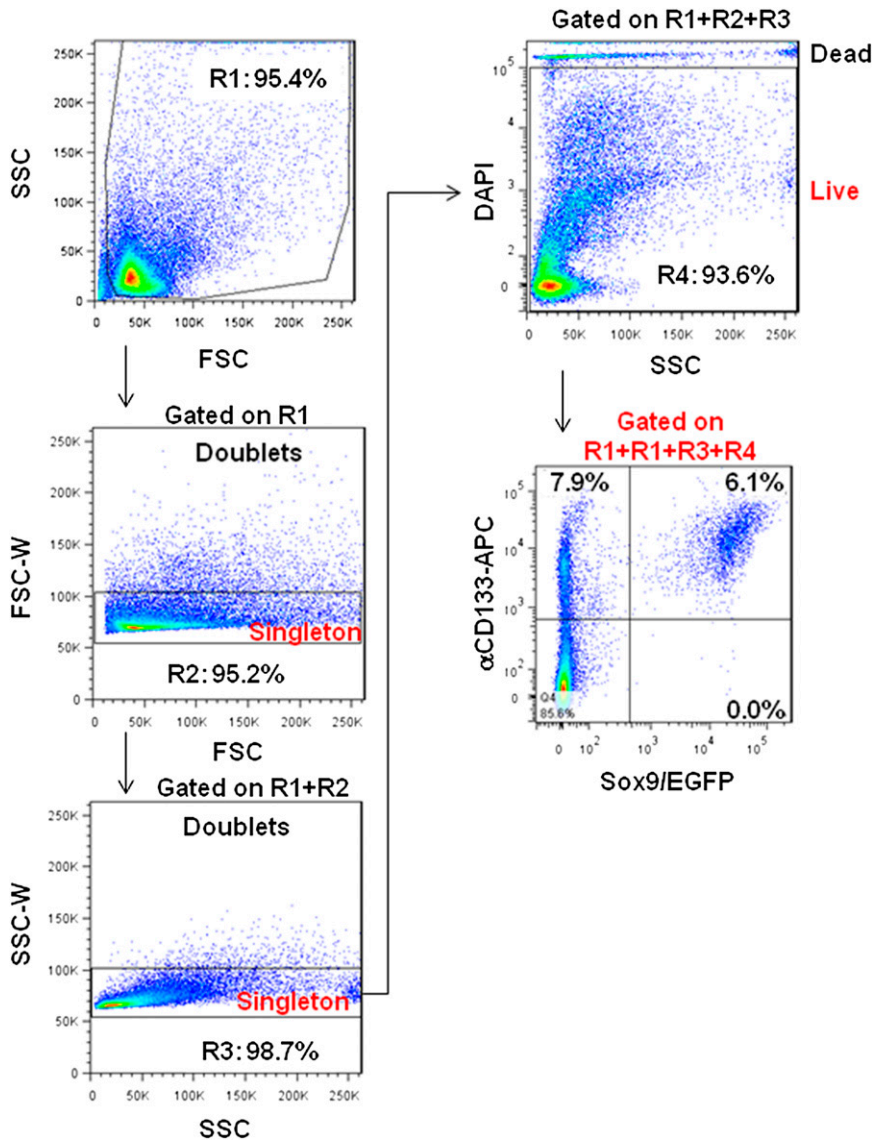

Fig. S2. Representative sorting windows for CD133<sup>+</sup>Sox9/EGFP<sup>+</sup> cells.

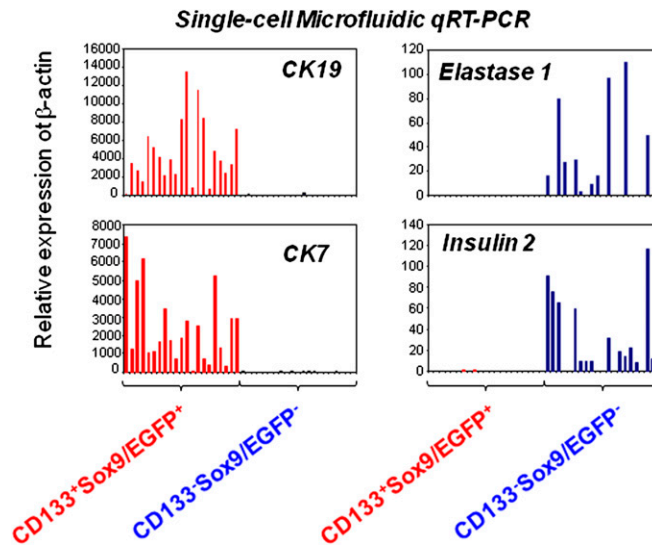

**Fig. S3.** Microfluidic qRT-PCR analysis on individually handpicked cells reveals that  $CD133^+Sox9/EGFP^+$  cells express ductal but not acinar or endocrine markers. Each bar is from a single cell.

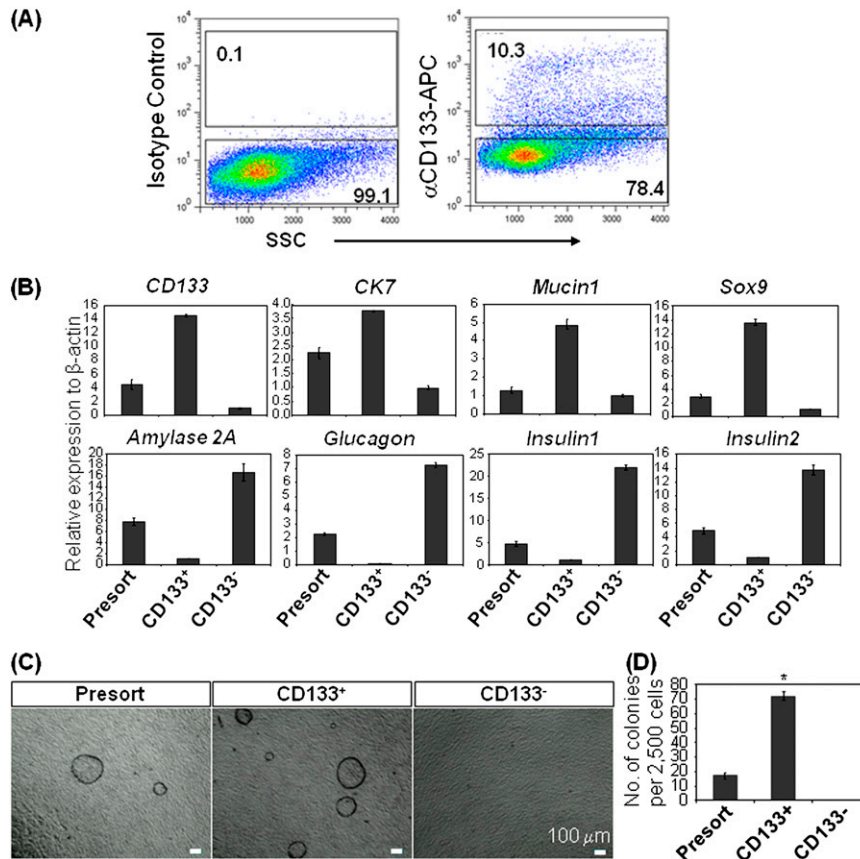

**Fig. S4.** Sorted  $CD133^+$  cells from adult B6 pancreata are enriched for ductal gene expression and Ring colony-forming activities.  $CD133^+$  cells were stained with anti- $CD133$  antibody and sorted by fluorescence-activated cell sorting. **(A)** Flow cytometric analysis of dissociated adult pancreatic cells. **(B)** Sorted  $CD133^+$  and  $CD133^-$  cells were analyzed by qRT-PCR for expression of pancreatic lineage markers using Taqman probes. **(C)** Photomicrographs of colonies grown from different sources of cell populations 3 wk postplating. **(D)** The number of colonies generated from each population of cells was scored. Data represent mean  $\pm$  SD of colonies from triplicate wells. \* $P < 0.05$  compared with the presort cells.

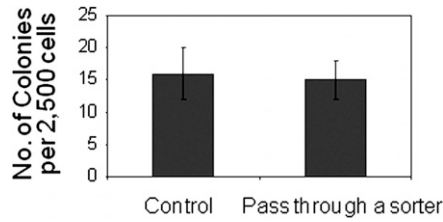

Fig. 55. Colony-forming efficiency of dissociated adult pancreatic cells that have passed through a sorter is the same as that of cells that have not (control).

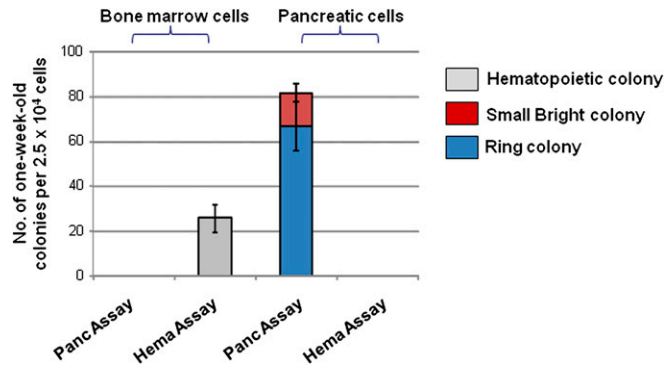

Fig. 56. Hematopoietic cells do not form Ring colonies in the pancreatic colony assay containing Matrigel. A total of 25,000 cells from bone marrow (femur) or pancreas were plated per well. Hematopoietic colony assay medium contains DMEM/F12, 1.0% methylcellulose, 30% FCS, 100 ng/mL interleukin-3, 100 ng/mL interleukin-6, and 2 U/mL erythropoietin. Colonies were counted 7 d postculture. Data represent the mean and SD of values obtained from three wells.

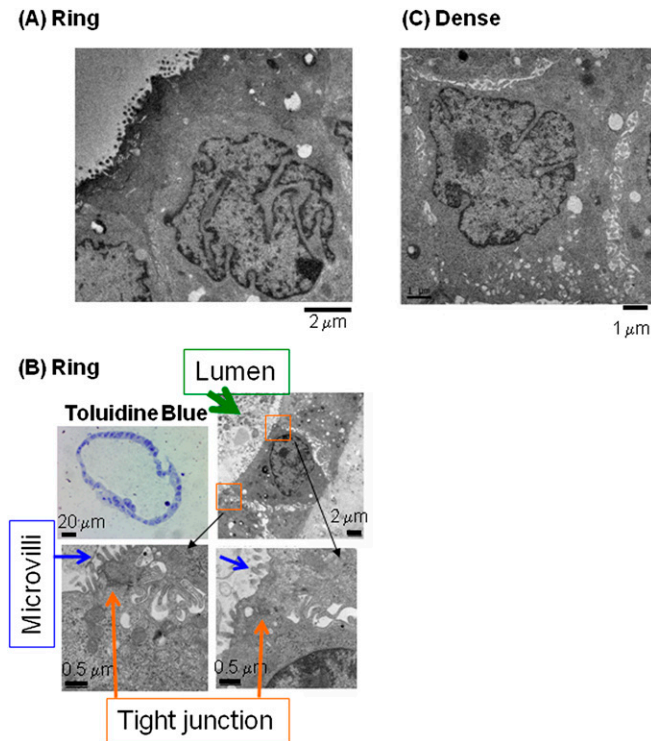

Fig. 57. Transmission electron microscopy reveals cells in 3-wk-old Ring colonies have ultra-structures consistent with ductal phenotype, including multilobed nucleus (A) and microvilli and tight junctions facing the lumen (B). (C) A 3-wk-old Dense colony also contains ductal-like cells.

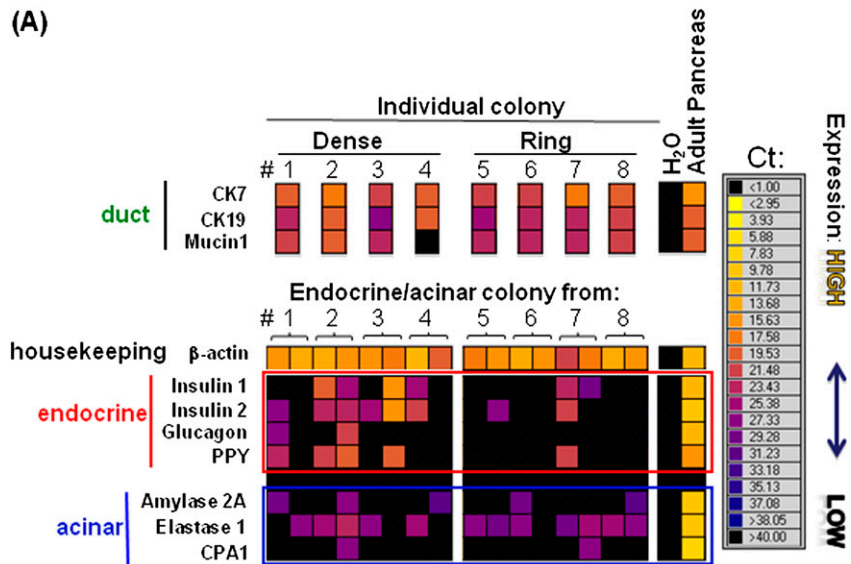

(B) Whole-mount staining of Endocrine/Acinar colonies

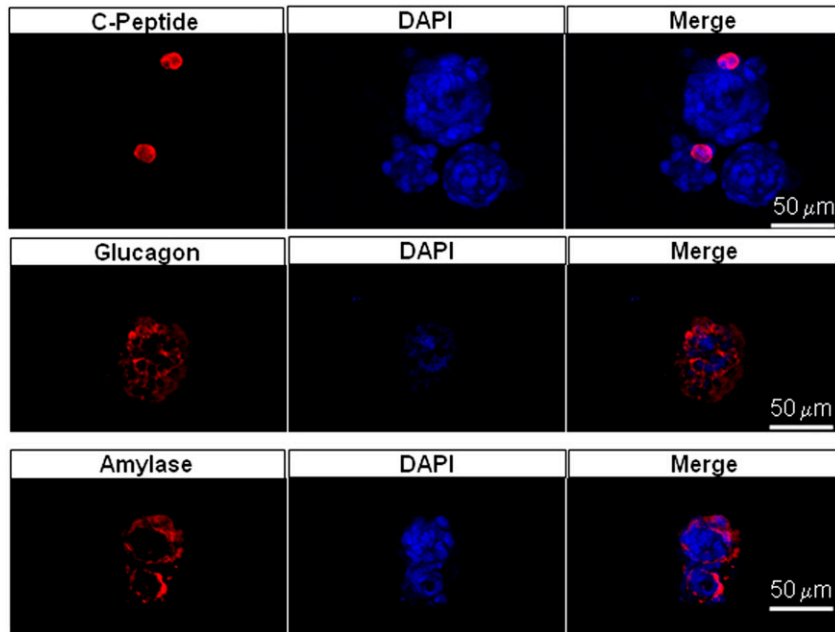

**Fig. S8.** Trilineage potential of single PCFUs–Dense. (A) Individual CD133<sup>+</sup>Sox9/EGFP<sup>+</sup> cells ( $n = 120$  each group) were plated at 1 cell/well in a 96-well plate containing Matrigel and with (for Dense colony formation) or without RSP01 (for control Ring colonies). Three weeks later, individual Dense or Ring colonies ( $n = 4$  from each group) were handpicked and dissociated into single-cell suspension. One half of the dissociated cells was analyzed for expression of ductal markers (*Upper*), and the other half was replated into laminin hydrogel and cultured for 2 wk. Two of the resulting Endocrine/Acinar colonies from each well were randomly selected and analyzed by microfluidic qRT-PCR analysis (*Lower*). Each column is from a single colony. (B) Whole-mount immunostaining of Dense colony-derived Endocrine/Acinar colonies.

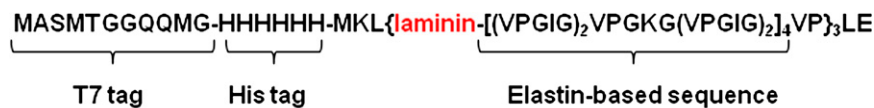

**laminin**=LDASCSRARKQAASIKVAVSADRASA

**Fig. S9.** Amino acid sequence of the artificial extracellular matrix protein used in this report. “Laminin” denotes a partial sequence from laminin  $\alpha$ 1 chain.

**Table S1. List of murine Taqman probes used for microfluidic quantitative RT-PCR analysis**

| Murine gene                  | Assay ID from Applied Biosystems-Invitrogen |
|------------------------------|---------------------------------------------|
| B-Actin                      | Mm 00607939_s1                              |
| B2 microglobulin             | Mm 00437762_m1                              |
| Cyclophilin G                | Mm01328875_m1                               |
| CK7                          | Mm 00466676_m1                              |
| Carbonic anhydrase (CA) II   | Mm 00501572_m1                              |
| Mucin 1                      | Mm00449604_m1                               |
| Sox9                         | Mm 00448840_m1                              |
| CD133                        | Mm00477115_m1                               |
| C-Met                        | Mm01156972_m1                               |
| Insulin 1                    | Mm01259683_g1                               |
| Insulin 2                    | Mm 00731595_gH                              |
| Glucagon                     | Mm 00801712_m1                              |
| Pancreatic polypeptide (PPY) | Mm 00435889_m1                              |
| Somatostatin                 | Mm 00436671_m1                              |
| Ghrelin                      | Mm 00445450_m1                              |
| Amylase 2A                   | Mm02342487_g1                               |
| Elastase 1                   | Mm00712898_m1                               |
| Carboxypeptidase A (CPA) 1   | Mm 00465942_m1                              |
| Ngn3                         | Mm00437606_s1                               |
| Pcsk1                        | Mm00479023_m1                               |
| Pcsk2                        | Mm00500981_m1                               |

**Table S2. List of antibodies used for immunohistochemistry**

| Antigen                                       | Species/conjugation | Source                                                   | Dilution |
|-----------------------------------------------|---------------------|----------------------------------------------------------|----------|
| <b>Primary antibodies</b>                     |                     |                                                          |          |
| Sox9                                          | Rabbit              | Chemicon                                                 | 1:1,000  |
| Pdx-1                                         | Guinea pig          | Chris Wright (Vanderbilt University, Nashville, TN)      | 1:10,000 |
| Glucagon                                      | Mouse               | Sigma                                                    | 1:5,000  |
| C-peptide                                     | Rabbit              | Cell Signaling                                           | 1:500    |
| Amylase                                       | Rabbit              | Sigma                                                    | 1:500    |
| EGFP                                          | Rat                 | Chrissa Kioussi (Oregon State University, Corvallis, OR) | 1:1,000  |
| Mucin-1                                       | Armenian hamster    | Lab Vision                                               | 1:200    |
| Osteopontin (Spp1)                            | Goat                | R&D Systems                                              | 1:1,000  |
| Ngn3                                          | Rabbit              | Millipore                                                | 1:500    |
| <b>Secondary antibodies</b>                   |                     |                                                          |          |
| Rabbit/goat/mouse/guinea pig/rat              | Alexa-488           | Invitrogen                                               | 1:2,000  |
| Rabbit/goat/mouse/guinea pig                  | Cy3                 | Jackson ImmunoResearch                                   | 1:2,000  |
| Rabbit/goat/mouse/guinea pig/armenian hamster | Cy5                 | Jackson ImmunoResearch                                   | 1:500    |
